# Supplementary material
Source: Springer Nature journal article supplement (http://www.springermedizin.de/resource/supplementary/12968_2012_2650_MOESM2_ESM.pdf/9582414)

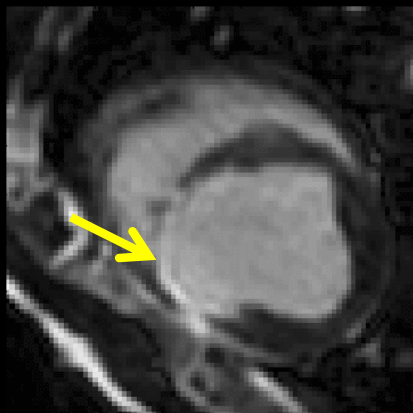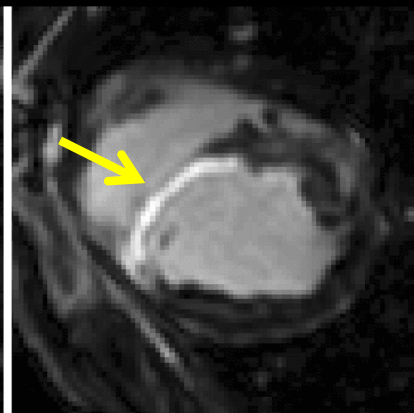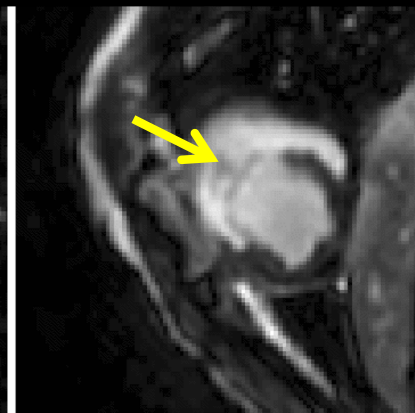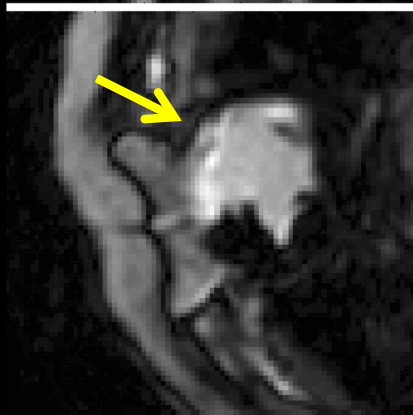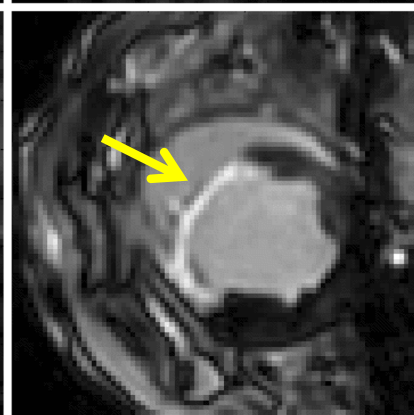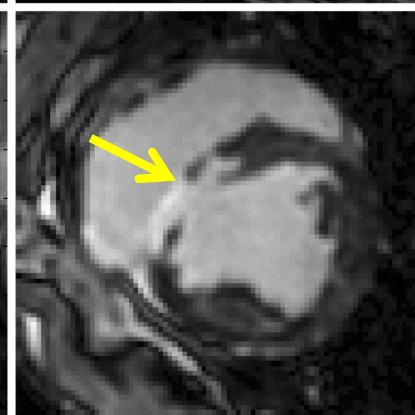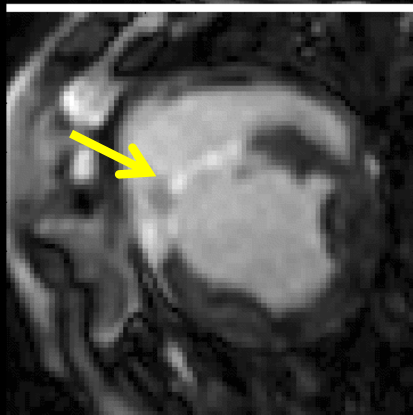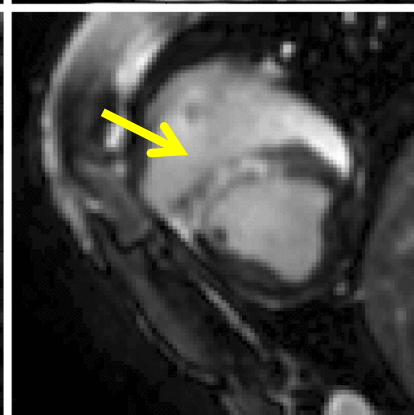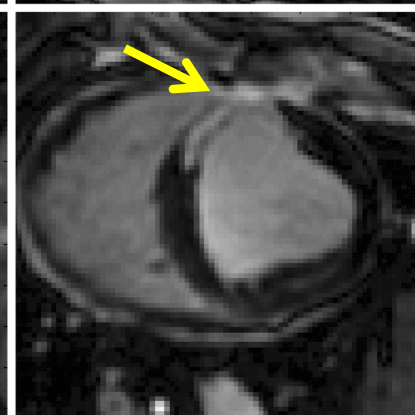

Supplement: MOESM2 [file 9582414]
